# Supplementary material for: Cdk5rap1-mediated 2-methylthio-N6-isopentenyladenosine modification is absent from nuclear-derived RNA species
Source: PubMed Central journal article supplement — Nucleic Acids Res. 2017 Sep 14;45(20):11954–61. doi: 10.1093/nar/gkx819 (PMC5714233; doi:10.1093/nar/gkx819), 2017-09-14
Supplement: gkx819_supp.pdf [file gkx819_supp.pdf]

Figure S1

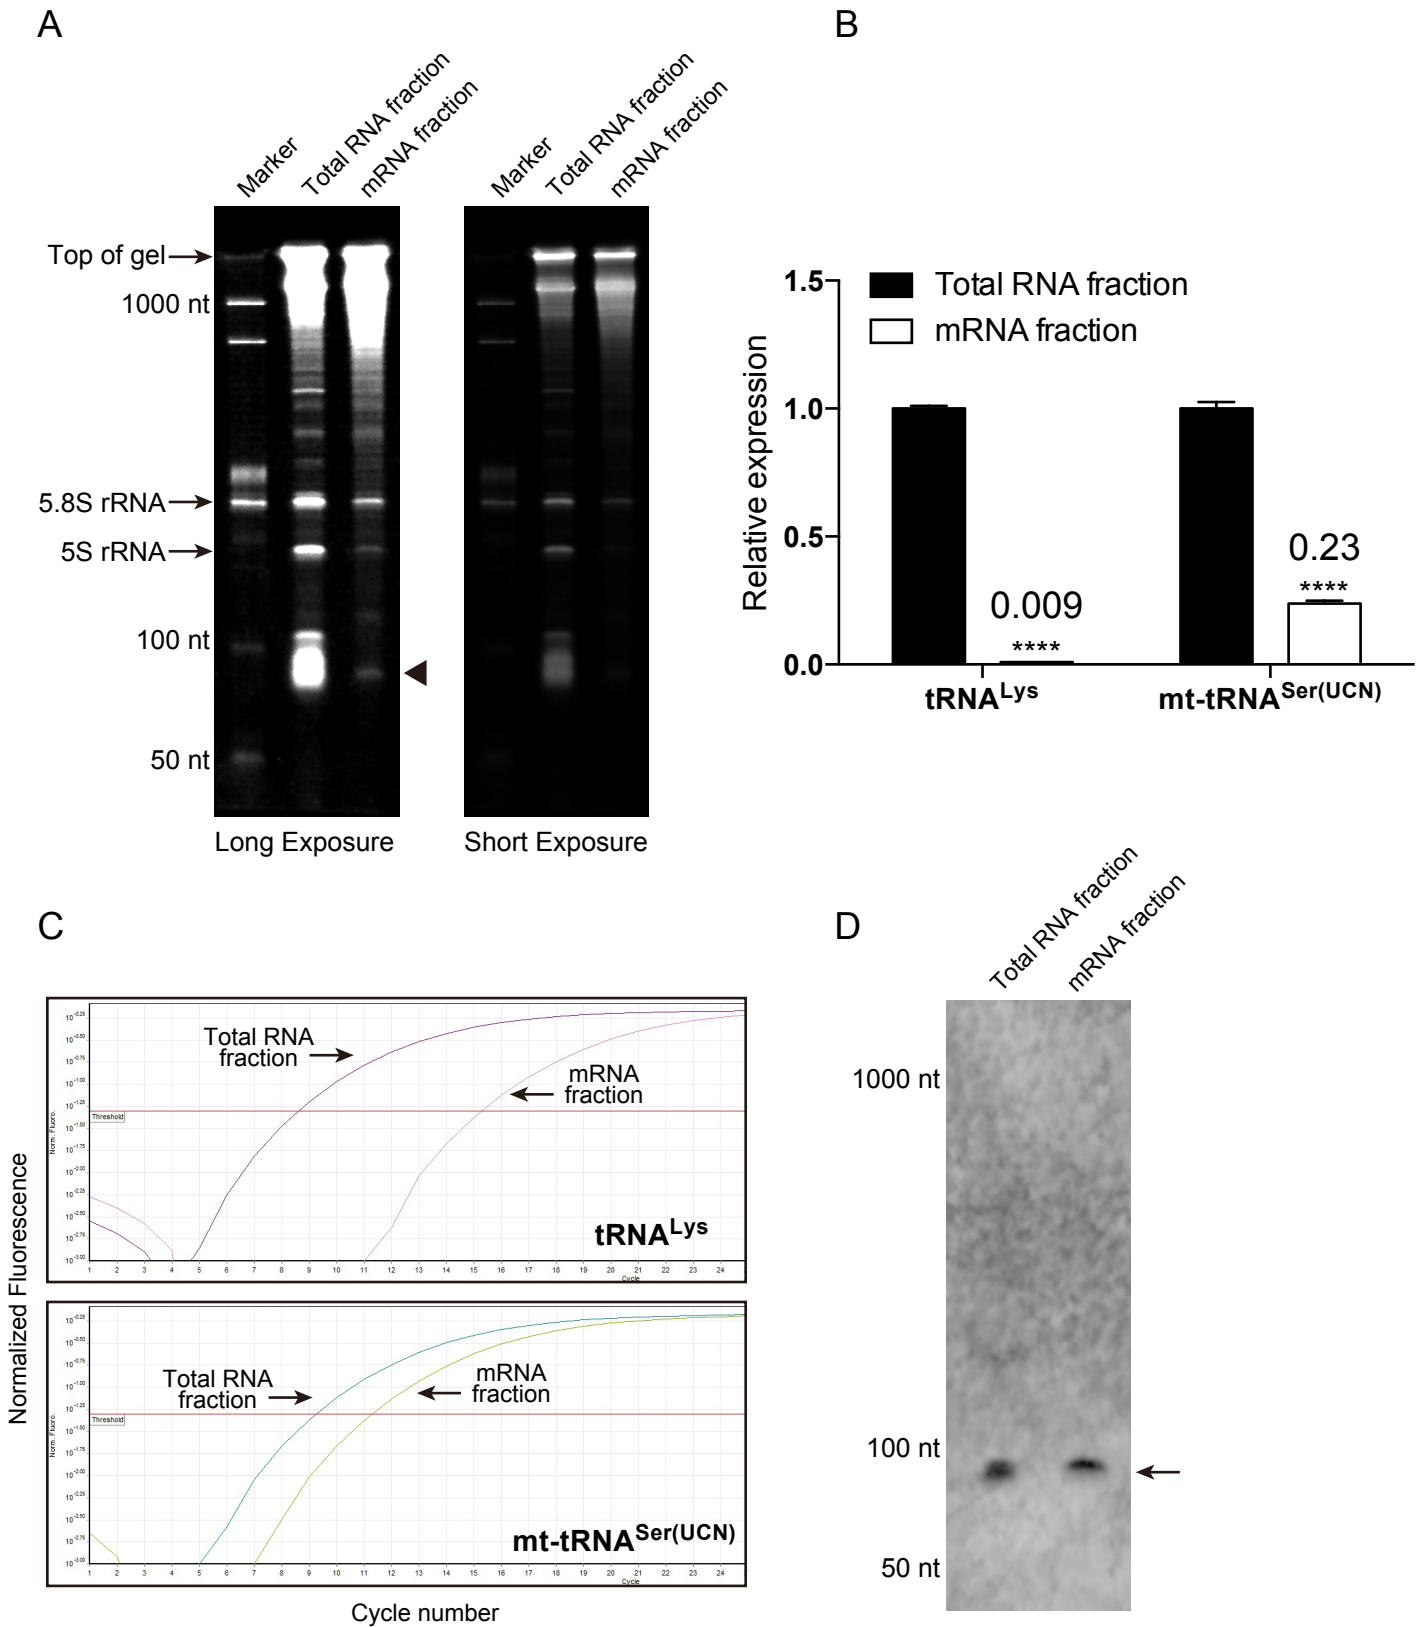

## Supplementary Figure Legend

**Figure S1. Signal of  $ms^2i^6A$  modification was not detected in mRNA fraction except for the tRNA region.**

(A) Total RNA and mRNA fractions were separated by electrophoresis in denaturing TBE-UREA gel. Arrowhead indicates the position corresponding to tRNA. Note that tRNA was still detectable in mRNA fraction. (B) Quantitative PCR analysis of the level of cytosolic tRNA<sup>Lys</sup> and mt-tRNA<sup>Ser(UCN)</sup> in total RNA and mRNA fractions. Numbers above the bars indicate the fold change of each tRNA in mRNA fraction when compared to total RNA fraction.  $n = 3$  each.  $****P < 0.0001$  by Student's t-test. (C) Representative PCR amplification curve of tRNA<sup>Lys</sup> and mt-tRNA<sup>Ser(UCN)</sup> in total RNA and mRNA fractions. Note that substantial amounts of tRNA<sup>Lys</sup> and mt-tRNA<sup>Ser(UCN)</sup> remained even after extensive purification. (D) Total RNA and mRNA were transferred to the membrane followed by immunoblotting with anti- $ms^2i^6A$  antibody. Note that anti- $ms^2i^6A$  antibody only detected modifications in tRNA, but not in mRNA.
